# Supplementary material for: Safety Considerations for Thermoplastic-Type Appliances Used as Orthodontic Aligners or Retainers. A Systematic Review and Meta-Analysis of Clinical and In-Vitro Research
Source: Materials (Basel). 2020 Apr 14;13(8):1843. doi: 10.3390/ma13081843 (PMC7215465; doi:10.3390/ma13081843)
Supplement: Supplementary file 1 [file materials-13-01843-s001.pdf]

# Supplementary Materials

## Safety Considerations for Thermoplastic-Type Appliances Used as Orthodontic Aligners or Retainers. A Systematic Review and Meta-Analysis of Clinical and In-Vitro Research

Anna Iliadi <sup>1,†</sup>, Despina Koletsis <sup>2,†</sup>, Spyridon N. Papageorgiou <sup>2</sup> and Theodore Eliades <sup>2,\*</sup>

<sup>1</sup> Department of Biomaterials, School of Dentistry, National and Kapodistrian University of Athens, 11527 Athens, Greece; annaeliades@gmail.com

<sup>2</sup> Clinic of Orthodontics and Pediatric Dentistry, Center of Dental Medicine, University of Zurich, 8032 Zurich, Switzerland; d.koletsis@gmail.com (D.K.); snpapage@gmail.com (S.N.P.)

\* Correspondence: Theodore.Eliades@zzm.uzh.ch

† Equal author contribution

**Table S1.** Detailed assessment of included randomized trials with the RoB 2.0 tool (supplement to Table 2).

| Domain                                    | Reference            | Raghavan 2017                                                  |
|-------------------------------------------|----------------------|----------------------------------------------------------------|
| 1. Randomization process                  | 1.1                  | PN                                                             |
|                                           | 1.2                  | PN                                                             |
|                                           | 1.3                  | PY                                                             |
|                                           | Assessor's Judgement | High                                                           |
| 2. Deviations from intended interventions | 2.1                  | PY                                                             |
|                                           | 2.2                  | PY                                                             |
|                                           | 2.3                  | PY                                                             |
|                                           | 2.4                  | PY                                                             |
|                                           | 2.5                  | NI                                                             |
|                                           | 2.6                  | NI                                                             |
|                                           | 2.7                  | NI                                                             |
|                                           | Assessor's Judgement | High                                                           |
| 3. Missing outcome data                   | 3.1                  | PY                                                             |
|                                           | 3.2                  | NA                                                             |
|                                           | 3.3                  | NA                                                             |
|                                           | 3.4                  | NA                                                             |
|                                           | Assessor's judgement | Low                                                            |
| 4. Measurement of the outcome             | 4.1                  | PN                                                             |
|                                           | 4.2                  | PN                                                             |
|                                           | 4.3                  | NI                                                             |
|                                           | 4.4                  | PY                                                             |
|                                           | 4.5                  | PN                                                             |
|                                           | Assessor's Judgement | Some concerns                                                  |
| 5. Selection of the reported result       | 5.1                  | NI                                                             |
|                                           | 5.2                  | PN                                                             |
|                                           | 5.3                  | NI                                                             |
|                                           | Assessor's Judgement | Some concerns                                                  |
| Overall                                   | Assessor's Judgement | High                                                           |
| –                                         | General Note         | No pre- registered protocol of the trial is publicly available |

Y, yes; PY, probably yes; N, no; PN, probably no; NI, no information; NA, not applicable.

**Table S2.** Summary of Findings Table and quality of the evidence regarding retainers' effect on bisphenol-A (BPA) leaching.

| <b>BPA Levels (Whole Saliva Stimulation)</b>                                                                                                                                                                                                                                                                                                                     |                                                                                                                                                  |                                         |                          |                                                |
|------------------------------------------------------------------------------------------------------------------------------------------------------------------------------------------------------------------------------------------------------------------------------------------------------------------------------------------------------------------|--------------------------------------------------------------------------------------------------------------------------------------------------|-----------------------------------------|--------------------------|------------------------------------------------|
| <b>Patient or population: Patients in retention phase (post- orthodontic treatment)</b>                                                                                                                                                                                                                                                                          |                                                                                                                                                  |                                         |                          |                                                |
| <b>Design: Randomized Controlled Trial</b>                                                                                                                                                                                                                                                                                                                       |                                                                                                                                                  |                                         |                          |                                                |
| <b>Interventions: VFRs or Hawley heat-cured or Hawley chemically-cured</b>                                                                                                                                                                                                                                                                                       |                                                                                                                                                  |                                         |                          |                                                |
| <b>Outcomes</b>                                                                                                                                                                                                                                                                                                                                                  | <b>Illustrative comparative risks*<br/>(95% CI)</b>                                                                                              | <b>No of Participants<br/>(studies)</b> |                          | <b>Quality of the<br/>evidence<br/>(GRADE)</b> |
|                                                                                                                                                                                                                                                                                                                                                                  | Corresponding risk                                                                                                                               | –                                       | –                        | –                                              |
| –                                                                                                                                                                                                                                                                                                                                                                | VFR/Hawley heat cured/Hawley chemically cured                                                                                                    | –                                       | –                        | –                                              |
| BPA levels (VFR vs Hawley heat cured); 7 days                                                                                                                                                                                                                                                                                                                    | The mean BPA levels (VFR vs Hawley heat cured); 7 days; in the intervention groups was 2.38 higher (1.47 to 3.29 higher)                         | 30 (1 study)                            | ⊕⊕⊕⊕<br>low <sup>1</sup> | –                                              |
| BPA levels (VFR vs Hawley chemically cured); 7 days                                                                                                                                                                                                                                                                                                              | The mean BPA levels (VFR vs Hawley chemically cured); 7 days; in the intervention groups was 2.38 higher (1.47 to 3.29 higher)                   | 30 (1 study)                            | ⊕⊕⊕⊕<br>low <sup>1</sup> | –                                              |
| BPA levels (Hawley heat cured vs Hawley chemically cured); 7 days                                                                                                                                                                                                                                                                                                | The mean BPA levels (Hawley heat cured vs Hawley chemically cured); 7 days; in the intervention groups was 0.0035 lower (0.0037 to 0.0032 lower) | 30 (1 study)                            | ⊕⊕⊕⊕<br>low <sup>1</sup> | –                                              |
| BPA levels (VFR vs Hawley heat cured); 30 days                                                                                                                                                                                                                                                                                                                   | The mean BPA levels (VFR vs Hawley heat cured); 30 days in the intervention groups was 0.20 higher (0.16 to 0.25 higher)                         | 30 (1 study)                            | ⊕⊕⊕⊕<br>low <sup>1</sup> | –                                              |
| BPA levels (VFR vs Hawley chemically cured); 30 days                                                                                                                                                                                                                                                                                                             | The mean BPA levels (VFR vs Hawley chemically cured); 30 days in the intervention groups was 0.20 higher (0.15 to 0.24 higher)                   | 30 (1 study)                            | ⊕⊕⊕⊕<br>low <sup>1</sup> | –                                              |
| BPA levels (Hawley heat cured vs Hawley chemically cured); 30 days                                                                                                                                                                                                                                                                                               | The mean BPA levels (Hawley heat cured vs Hawley chemically cured); 30 days in the intervention groups was 0.009 lower (0.010 to 0.007 lower)    | 30 (1 study)                            | ⊕⊕⊕⊕<br>low <sup>1</sup> | –                                              |
| *The basis for the assumed risk (e.g. the median control group risk across studies) is provided in footnotes. The corresponding risk (and its 95% confidence interval) is based on the assumed risk in the comparison group and the relative effect of the intervention (and its 95% CI). CI: Confidence interval; BPA, bisphenol-A; VFR, vacuum-formed retainer |                                                                                                                                                  |                                         |                          |                                                |
| GRADE Working Group grades of evidence                                                                                                                                                                                                                                                                                                                           |                                                                                                                                                  |                                         |                          |                                                |
| High quality: Further research is very unlikely to change our confidence in the estimate of effect.                                                                                                                                                                                                                                                              |                                                                                                                                                  |                                         |                          |                                                |
| Moderate quality: Further research is likely to have an important impact on our confidence in the estimate of effect and may change the estimate.                                                                                                                                                                                                                |                                                                                                                                                  |                                         |                          |                                                |

---

Low quality: Further research is very likely to have an important impact on our confidence in the estimate of effect and is likely to change the estimate.

Very low quality: We are very uncertain about the estimate.

---

<sup>1</sup> downgraded 2 levels due to serious risk of bias in certain critical domains

---

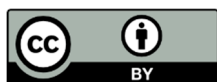

© 2019 by the authors. Submitted for possible open access publication under the terms and conditions of the Creative Commons Attribution (CC BY) license (<http://creativecommons.org/licenses/by/4.0/>).
